# Supplementary material
Source: publisher site journal article supplement (https://www.dovepress.com/article/326255)
Supplement: Supplementary file 1 [file get_supplementary_file.php]

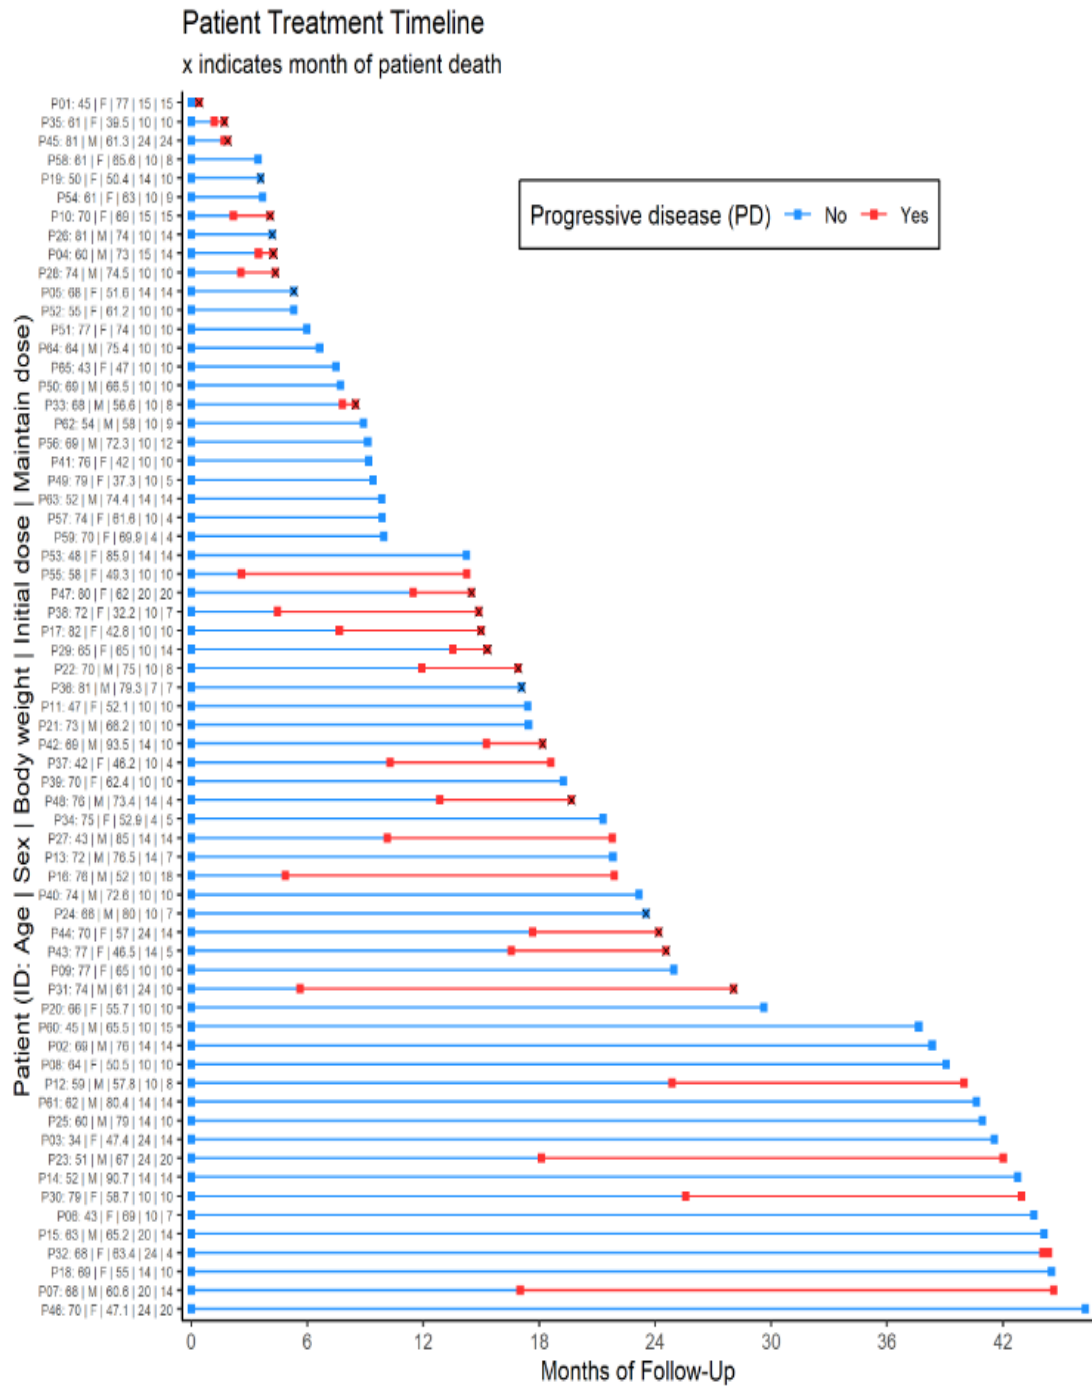

Supplementary Figure 1. The treatment timeline of all recruited patients of radioiodine-refractory differentiated thyroid carcinoma included patient's ID, age, sex, body weight, initial dose and maintenance dose of lenvatinib treatment.

Supplementary Table S1: Adverse events of low maintenance dose of lenvatinib

| <b>Adverse effect</b> | <b>Any grade</b> | <b>Grade 1</b> | <b>Grade 2</b> | <b>Grade 3</b> | <b>Grade 4</b> |
|-----------------------|------------------|----------------|----------------|----------------|----------------|
| Hypertension          | 42 (64.6%)       | 31 (47.7%)     | 9 (13.8%)      | 2 (3.1%)       | -              |
| Proteinuria           | 32 (49.2%)       | 17 (26.2%)     | 11 (16.9%)     | 4 (6.2%)       | -              |
| Diarrhea              | 13 (20.0%)       | 9 (13.8%)      | 4 (6.2%)       | -              | -              |
| Asthenia              | 36 (55.4%)       | 30 (46.2%)     | 5 (7.7%)       | 1 (1.5%)       | -              |
| Weight loss           | 19 (29.2%)       | 15 (23.1%)     | 4 (6.2%)       | -              | -              |
| Hand-foot syndrome    | 25 (38.5%)       | 16 (24.6%)     | 7 (10.8%)      | 2 (3.1%)       | -              |
| Anorexia              | 24 (36.9%)       | 20 (30.8%)     | 3 (4.6%)       | 1 (1.5%)       | -              |

The adverse effect was evaluated by the National Cancer Institute Common Terminology Criteria for Adverse Events (CTCAE) version 5.0.

Supplementary Table S2. ECOG details.

| Characteristics        | PD Group   |            | Non-PD patients | <i>P</i> |
|------------------------|------------|------------|-----------------|----------|
|                        | PFS≤10.5 m | PFS>10.5 m |                 |          |
| ECOG before lenvatinib |            |            |                 | 0.363    |
| 0                      | 2 (15.4%)  | 2 (14.3%)  | 13 (33.3%)      |          |
| 1                      | 8 (69.2%)  | 9 (69.2%)  | 23 (59.0%)      |          |
| 2                      | 1 (7.7%)   | 2 (15.4%)  | 2 (5.1%)        |          |
| 3                      | 1 (7.7%)   | -          | 1 (2.6%)        |          |
| 4                      | 1 (7.7%)   | -          | -               |          |
| ECOG after lenvatinib  |            |            |                 | 0.452    |
| 0                      | 1 (7.7%)   | 1 (7.1%)   | 8 (20.5%)       |          |
| 1                      | 9 (69.2%)  | 11 (84.6%) | 28 (71.8%)      |          |
| 2                      | 2 (15.4%)  | 1 (7.7%)   | 3 (7.7%)        |          |
| 3                      | 1 (7.7%)   | -          | -               |          |
| 4                      | -          | -          | -               |          |
